# Supplementary material for: Association between Advanced Glycation End-Products and Sarcopenia in Patients with Chronic Kidney Disease
Source: MDPI journal article supplement (doi:10.3390/biomedicines10071489), 2022-06-23
Supplement: s1 [file s1]

**Table S1.** Comparison between Diabetes and AGE-related parameters

| <b>Variables</b>            | <b>Non-Diabetic</b> | <b>Diabetic</b> | <b><i>p</i></b> |
|-----------------------------|---------------------|-----------------|-----------------|
| AGEs (arbitrary unit)       | 3152±829            | 2917±769        | 0,117           |
| sRAGE (pg/mL)               | 2456±1289           | 2272±1263       | 0,440           |
| esRAGE (pg/ml)              | 698±435             | 644±533         | 0,558           |
| cRAGE (pg/ml)               | 1758±914            | 1642±938        | 0,504           |
| AGEs/sRAGE (arbitrary unit) | 1,71±1.13           | 1.6±0.8         | 0,532           |

AGEs, Advanced Glycation End products; sRAGE, soluble receptor for AGE; esRAGE: endogenous secretory receptor for AGE; cRAGE: cleaved receptor for AGE.
